# Supplementary material
Source: HighWire-hosted journal article supplement (https://jnm.snmjournals.org/highwire/filestream/94071/field_highwire_adjunct_files/0/62919_Supplemental_Figure_1.pdf)
Supplement: 62919_Supplemental_Figure_1.pdf [file 62919_Supplemental_Figure_1.pdf]

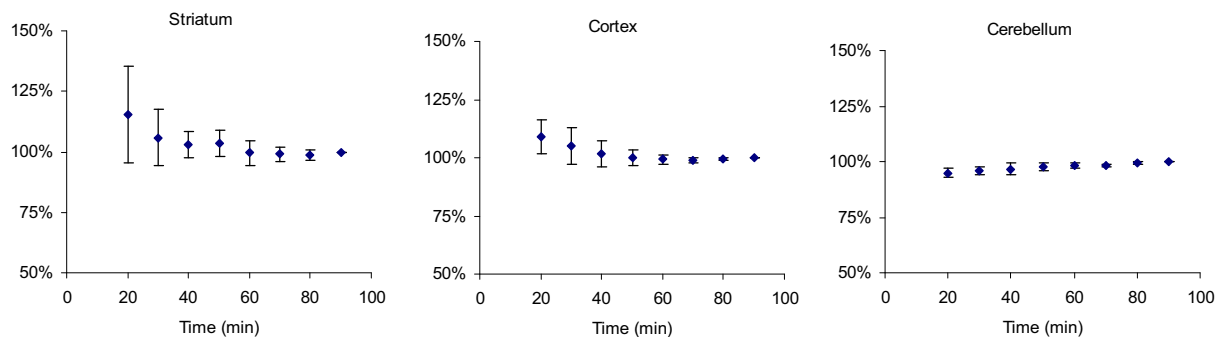

**SUPPLEMENTAL FIGURE 1.** Assessment of stability of  $V_T$  estimation from differing scan durations.  $V_T$  data is presented as the % of the value that was obtained using the full 90 min data set. The results are summarised for the five baseline scans across the subjects (mean  $\pm$  SD).
